# Supplementary material for: Synthesis of Chitosan/Diatomite Composite as an Advanced Delivery System for Ibuprofen Drug; Equilibrium Studies and the Release Profile
Source: PubMed Central journal article supplement — ACS Omega. 2021 May 13;6(20):13406–16. doi: 10.1021/acsomega.1c01514 (PMC8158818; doi:10.1021/acsomega.1c01514), 2021-05-13
Supplement: ao1c01514_si_001.pdf [file ao1c01514_si_001.pdf]

## **Supporting Information**

### **Synthesis of chitosan/diatomite composite as an advanced delivery system for ibuprofen drug; equilibrium studies and the release profile**

Sherouk M. Ibrahim <sup>\*†,‡</sup>, May N. Bin Jumah <sup>\*\*¶</sup>, Sarah I. Othman <sup>¶</sup>, Reem Saleh Alruhaimi<sup>¶</sup>, Nora Al-Khalawi <sup>¶</sup>, Yasser F. Salama<sup>§</sup>, Ahmed A. Allam <sup>&</sup>, Mostafa R.

Abukhadra<sup>\*†,§</sup>

<sup>†</sup> Materials Technologies and their Applications Lab, Geology Department, Faculty of Science, Beni-Suef University, Beni-Suef City, Egypt

<sup>‡</sup> Chemistry Department, Faculty of Science, Beni-Suef University, Beni-Suef city

<sup>¶</sup> Biology Department, Faculty of Science, Princess Nourah bint Abdulrahman University, Riyadh, Saudi Arabia

<sup>§</sup> Geology Department, Faculty of Science, Beni-Suef University, Beni-Suef city, Egypt

<sup>&</sup> Department of Zoology, Faculty of Science, Beni-suef University, Beni-Suef, 65211, Egypt

## **Content**

1. Table S1. the representative equations of the studied kinetic and isotherm model and their parameters.....S2

**Table S1.** The representative equations of the studied kinetic and isotherm models in their linear and nonlinear forms

| <b>Kinetic models</b>           |                                           |                                                                                                                                                                           |
|---------------------------------|-------------------------------------------|---------------------------------------------------------------------------------------------------------------------------------------------------------------------------|
| <b>Model</b>                    | <b>Linear equation</b>                    | <b>Parameters</b>                                                                                                                                                         |
| <b>Pseudo-first-order</b>       | $q_t = q_e (1 - e^{-k_1 t})$              | $q_t$ (mg/g) is the adsorbed ions at time (t), and $K_1$ is the rate constant of the first-order adsorption ( $\text{min}^{-1}$ )                                         |
| <b>Pseudo-second-order</b>      | $q_t = \frac{q_e^2 k_2 t}{1 + q_e k_2 t}$ | $q_e$ is the quantity of adsorbed ions after equilibration (mg/g), and $K_2$ is the model rate constant (g/mg min).                                                       |
| <b>Intra-particle diffusion</b> | $q_t = kt^{0.5} + C$                      | $k_p$ ( $\text{mg g}^{-1} \text{min}^{-0.5}$ ) is the intraparticle diffusion rate constant and $C$ is the intercept of the line                                          |
| <b>Isotherm models</b>          |                                           |                                                                                                                                                                           |
| <b>Model</b>                    | <b>Equation</b>                           | <b>Parameters</b>                                                                                                                                                         |
| <b>Langmuir</b>                 | $q_e = \frac{q_{max} b C_e}{(1 + b C_e)}$ | $C_e$ is the rest ions concentrations (mg/L), $q_{max}$ is the theoretical maximum adsorption capacity (mg/g), and $b$ is the Langmuir constant (L/mg)                    |
| <b>Freundlich</b>               | $q_e = K_f C_e^{1/n}$                     | $K_F$ is the constant of Freundlich model related to the adsorption capacity and $n$ is the constant of Freundlich model related to the adsorption intensities            |
| <b>Dubinin–Radushkevich</b>     | $q_e = q_m e^{-\beta \varepsilon^2}$      | $\beta$ ( $\text{mol}^2/\text{KJ}^2$ ) is the D-R constant, $\varepsilon$ ( $\text{KJ}^2/\text{mol}^2$ ) is the polanyiil potential, and $q_m$ is the adsorption capacity |
